# Supplementary material
Source: PubMed Central journal article supplement (PMC5627776)
Supplement: NIHMS861778-supplement-Add_fig_M3.pdf [file NIHMS861778-supplement-Add_fig_M3.pdf]

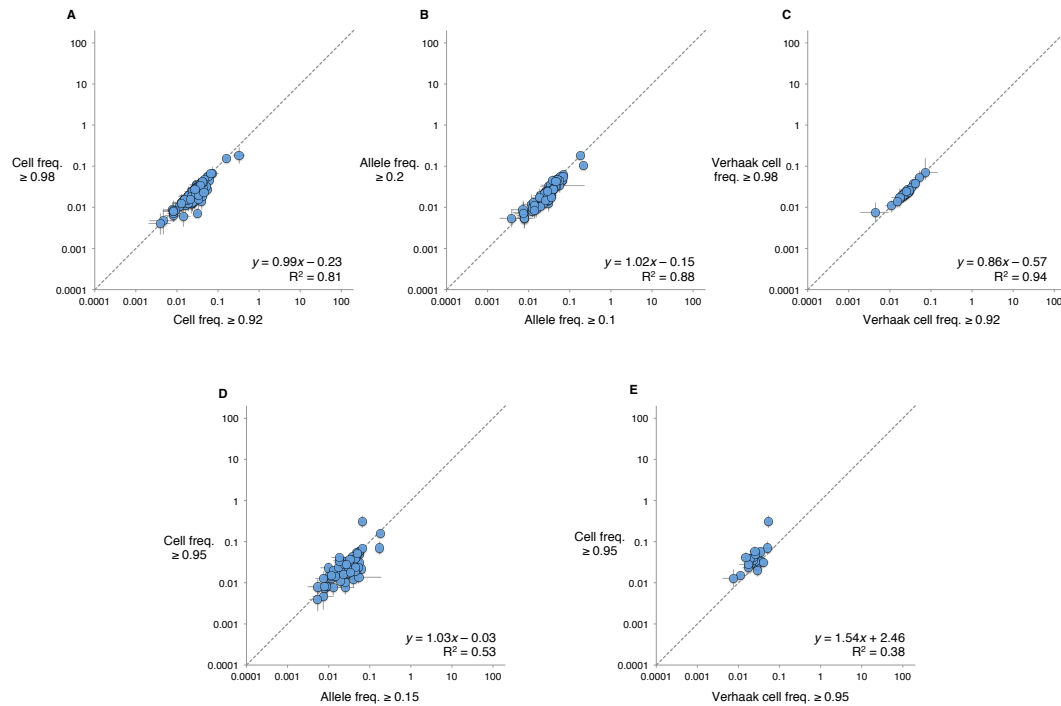

**Additional Figure M3. Sensitivity analysis for pre-treatment substitution rate, using a variety of clonality cutoffs.** Each panel shows per-patient comparisons of the estimated pre-treatment substitution rate, in substitutions per Mb-yr, for two different clonality cutoffs. (A) Mutant cellular frequency  $\geq 0.92$  (x-axis) versus  $\geq 0.98$  (y-axis). (B) Mutant allele frequency  $\geq 0.1$  (x-axis) versus  $\geq 0.2$  (y-axis). (C) Mutant cellular frequency as computed by Verhaak, et al.<sup>41</sup>  $\geq 0.92$  (x-axis) versus  $\geq 0.98$  (y-axis). (D) Mutant allele frequency  $\geq 0.15$  (x-axis) versus mutant cellular frequency  $\geq 0.95$  (cutoff used in Main Text, y-axis). (E) Mutant cellular frequency as computed by Verhaak, et al.<sup>41</sup>  $\geq 0.95$  (x-axis) versus mutant cellular frequency  $\geq 0.95$  (cutoff used in Main Text, y-axis). (A, B, C, D, E) Each symbol shows median estimate for a patient; error bars show interquartile range. Dashed diagonal shows case of perfect agreement between the two cutoffs. Formula and  $R^2$  shown for orthogonal linear regression of  $\log_{10}$  values.
