# Supplementary material
Source: PubMed Central journal article supplement (PMC5627776)
Supplement: NIHMS861778-supplement-Add_fig_M5.pdf [file NIHMS861778-supplement-Add_fig_M5.pdf]

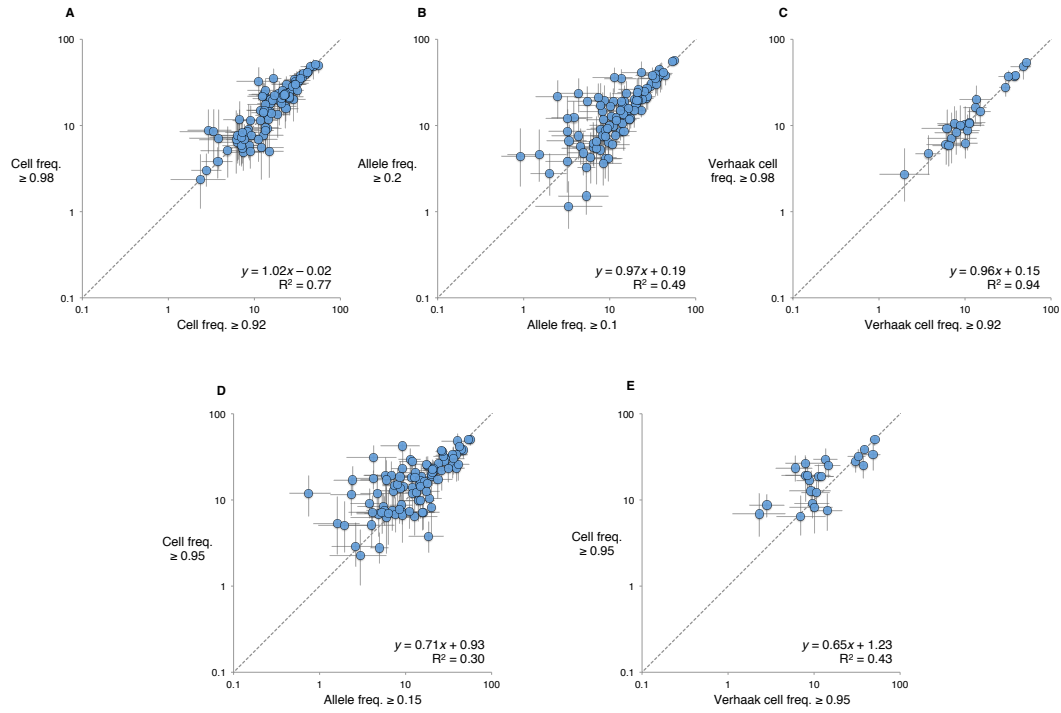

**Additional Figure M5. Sensitivity analysis for time between lineage divergence and diagnosis, using a variety of clonality cutoffs.** Each panel shows per-patient comparisons of the estimated time prior to diagnosis that the initial and recurrent lineages diverged, in years, for two different clonality cutoffs. All panels and legend as in Additional Figure M3.
