# Supplementary material
Source: PubMed Central journal article supplement (PMC5627776)
Supplement: NIHMS861778-supplement-Add_fig_M7.pdf [file NIHMS861778-supplement-Add_fig_M7.pdf]

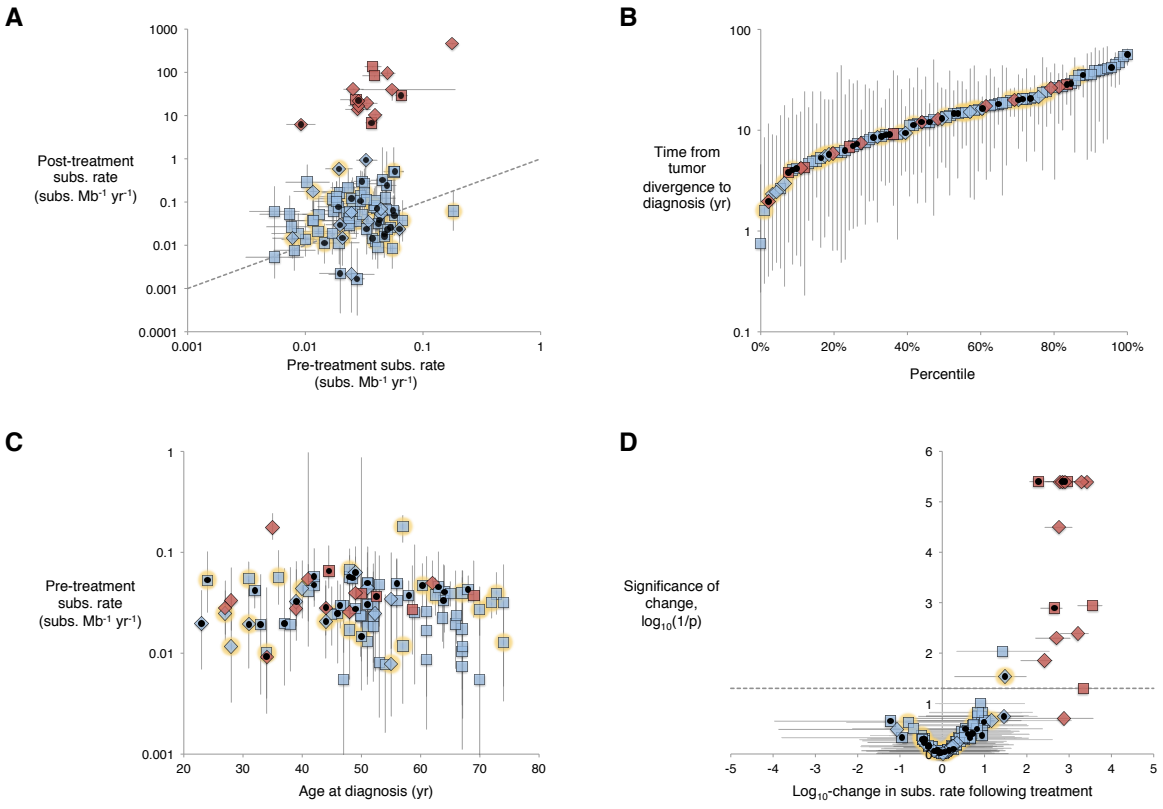

**Additional Figure M7. Evolutionary model analysis, using mutant allele frequency  $\geq 0.15$  as clonality cutoff. All panels and legend as in Additional Figure M1.**
