# Supplementary material
Source: PubMed Central journal article supplement (PMC5627776)
Supplement: NIHMS861778-supplement-Add_fig_M10.pdf [file NIHMS861778-supplement-Add_fig_M10.pdf]

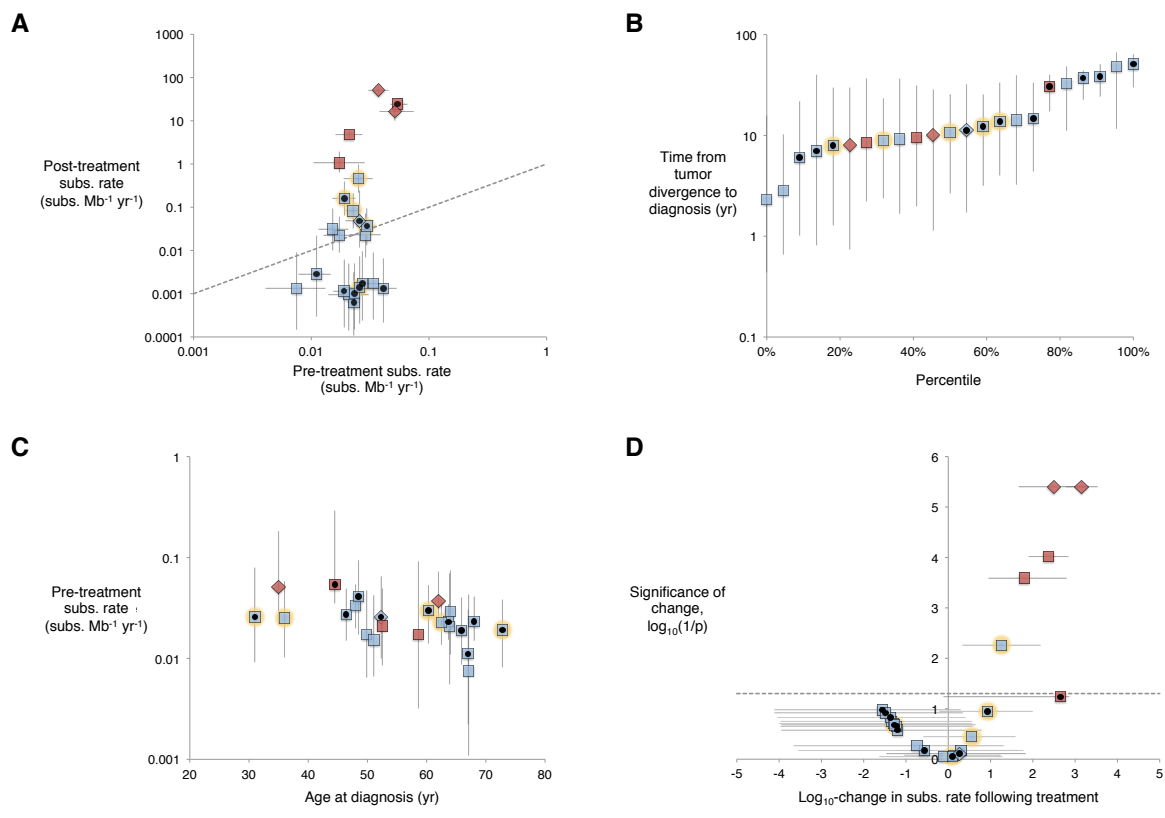

**Additional Figure M10. Evolutionary model analysis, using mutant cellular frequency as computed by Verhaak, et al.<sup>41</sup>  $\geq 0.95$  as clonality cutoff. All panels and legend as in Additional Figure M1.**
