# Supplementary material
Source: PubMed Central journal article supplement (PMC5627776)
Supplement: NIHMS861778-supplement-Add_fig_M11.pdf [file NIHMS861778-supplement-Add_fig_M11.pdf]

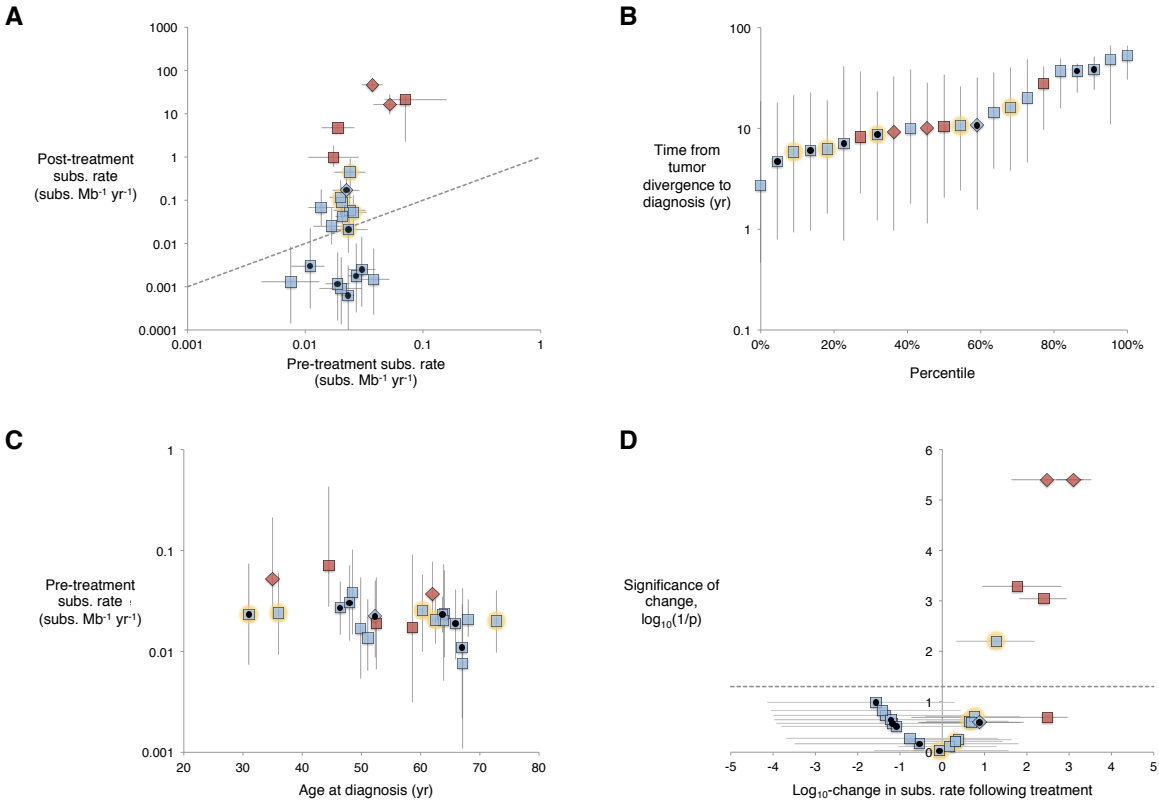

**Additional Figure M11. Evolutionary model analysis, using mutant cellular frequency as computed by Verhaak, et al.<sup>41</sup>  $\geq 0.98$  as clonality cutoff. All panels and legend as in Additional Figure M1.**

- 59 Bedford, T., Wapinski, I. & Hartl, D. L. Overdispersion of the molecular clock varies between yeast, *Drosophila* and mammals. *Genetics* **179**, 977-984 (2008).
- 60 Bedford, T. & Hartl, D. L. Overdispersion of the molecular clock: temporal variation of gene-specific substitution rates in *Drosophila*. *Mol. Biol. Evol.* **25**, 1631-1638 (2008).
- 61 Gelman, A., Lee, D. & Guo, J. Q. Stan: A Probabilistic Programming Language for Bayesian Inference and Optimization. *J Educ Behav Stat* **40**, 530-543 (2015).
