# Supplementary material
Source: PubMed Central journal article supplement (PMC5627776)
Supplement: NIHMS861778-supplement-Add_fig_M14.pdf [file NIHMS861778-supplement-Add_fig_M14.pdf]

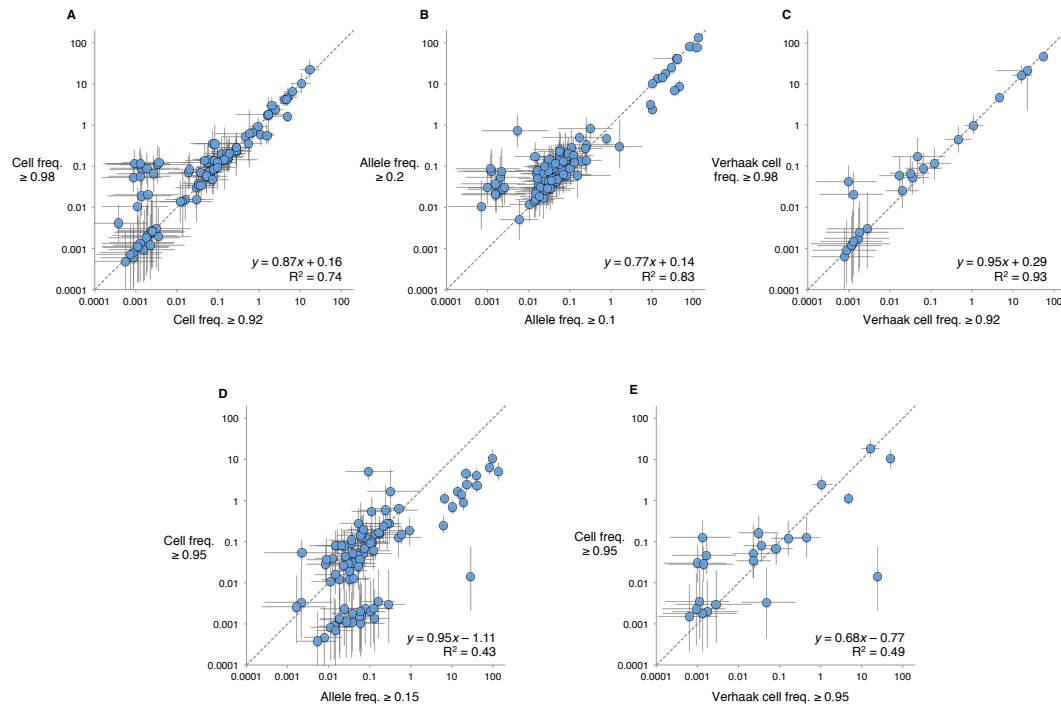

**Additional Figure M4. Sensitivity analysis for post-treatment substitution rate, using a variety of clonality cutoffs.** Each panel shows per-patient comparisons of the estimated post-treatment substitution rate, in substitutions per Mb-yr, for two different clonality cutoffs. All panels and legend as in Additional Figure M3.
