# Supplementary material
Source: PubMed Central journal article supplement (PMC5627776)
Supplement: NIHMS861778-supplement-suppl_fig__1.pdf [file NIHMS861778-supplement-suppl_fig__1.pdf]

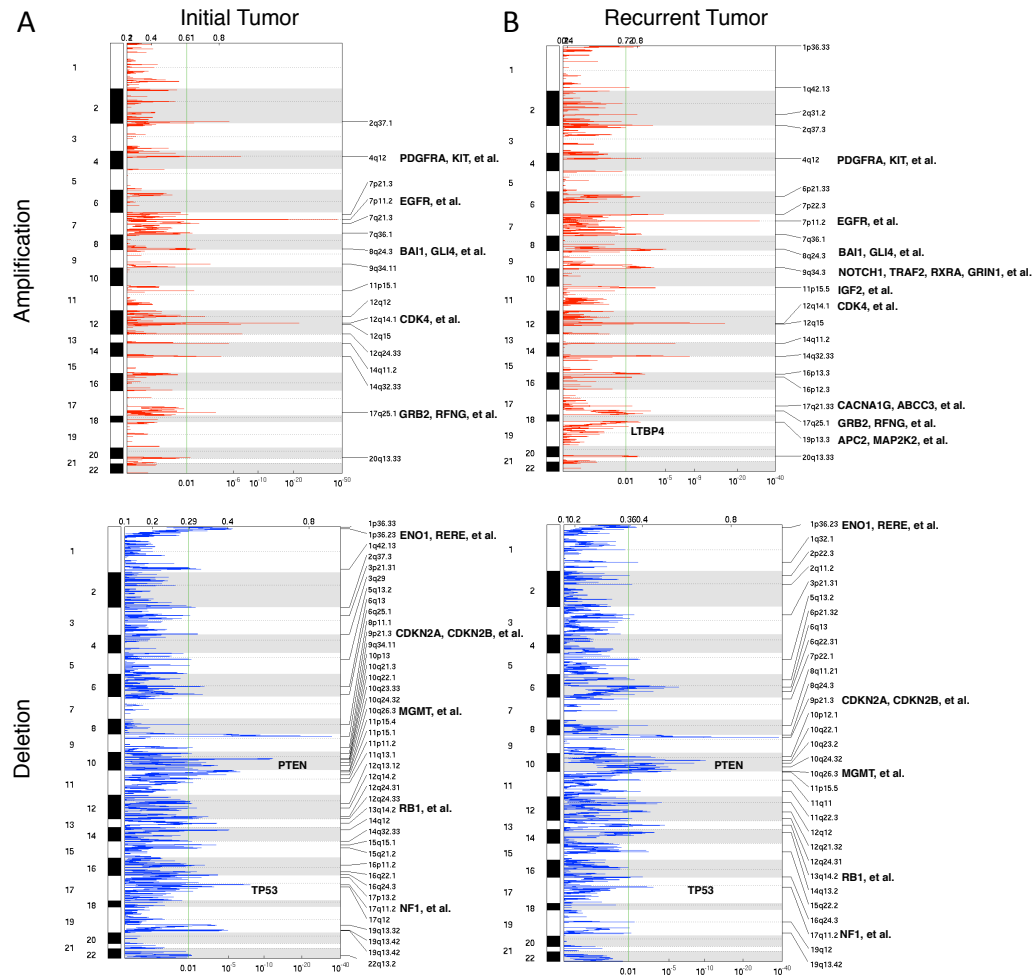

**Supplementary Figure 1: GISTIC2 qplots of initial (A) and recurrent (B) tumors.** Copy number segmentation files were generated by EXCAVATOR base on Whole Exome Sequencing data. The resulting seg files (genomic intervals), together with the union of whole exome probes from different platform were used in GISTIC version 2.0.22.
