# Supplementary material
Source: PubMed Central journal article supplement (PMC5627776)
Supplement: NIHMS861778-supplement-suppl_fig__2.pdf [file NIHMS861778-supplement-suppl_fig__2.pdf]

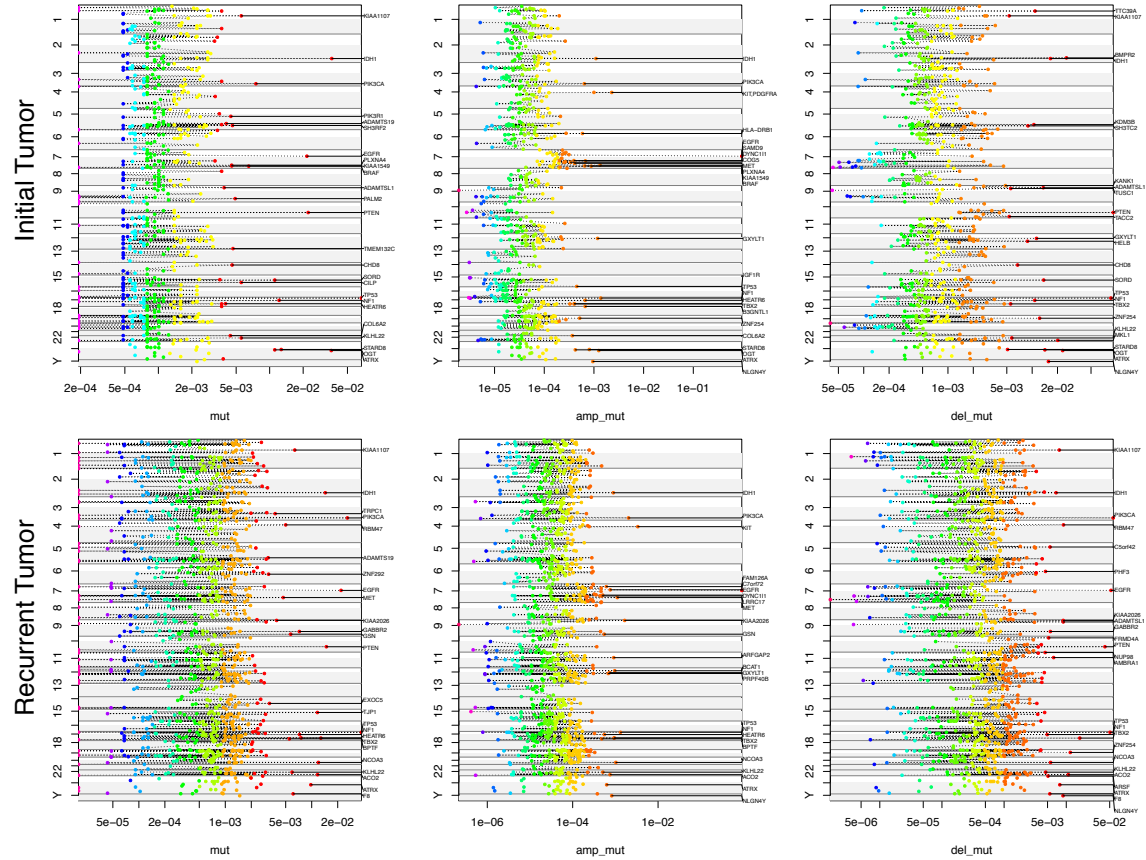

**Supplementary Figure 2:** MutComFocal reports frequently mutated, amplified, and deleted genes in initial and recurrent GBM samples. The analysis was based on selected mutations and WES-based copy number alteration data.
