# Supplementary material
Source: PubMed Central journal article supplement (PMC5627776)
Supplement: NIHMS861778-supplement-suppl_fig__3.pdf [file NIHMS861778-supplement-suppl_fig__3.pdf]

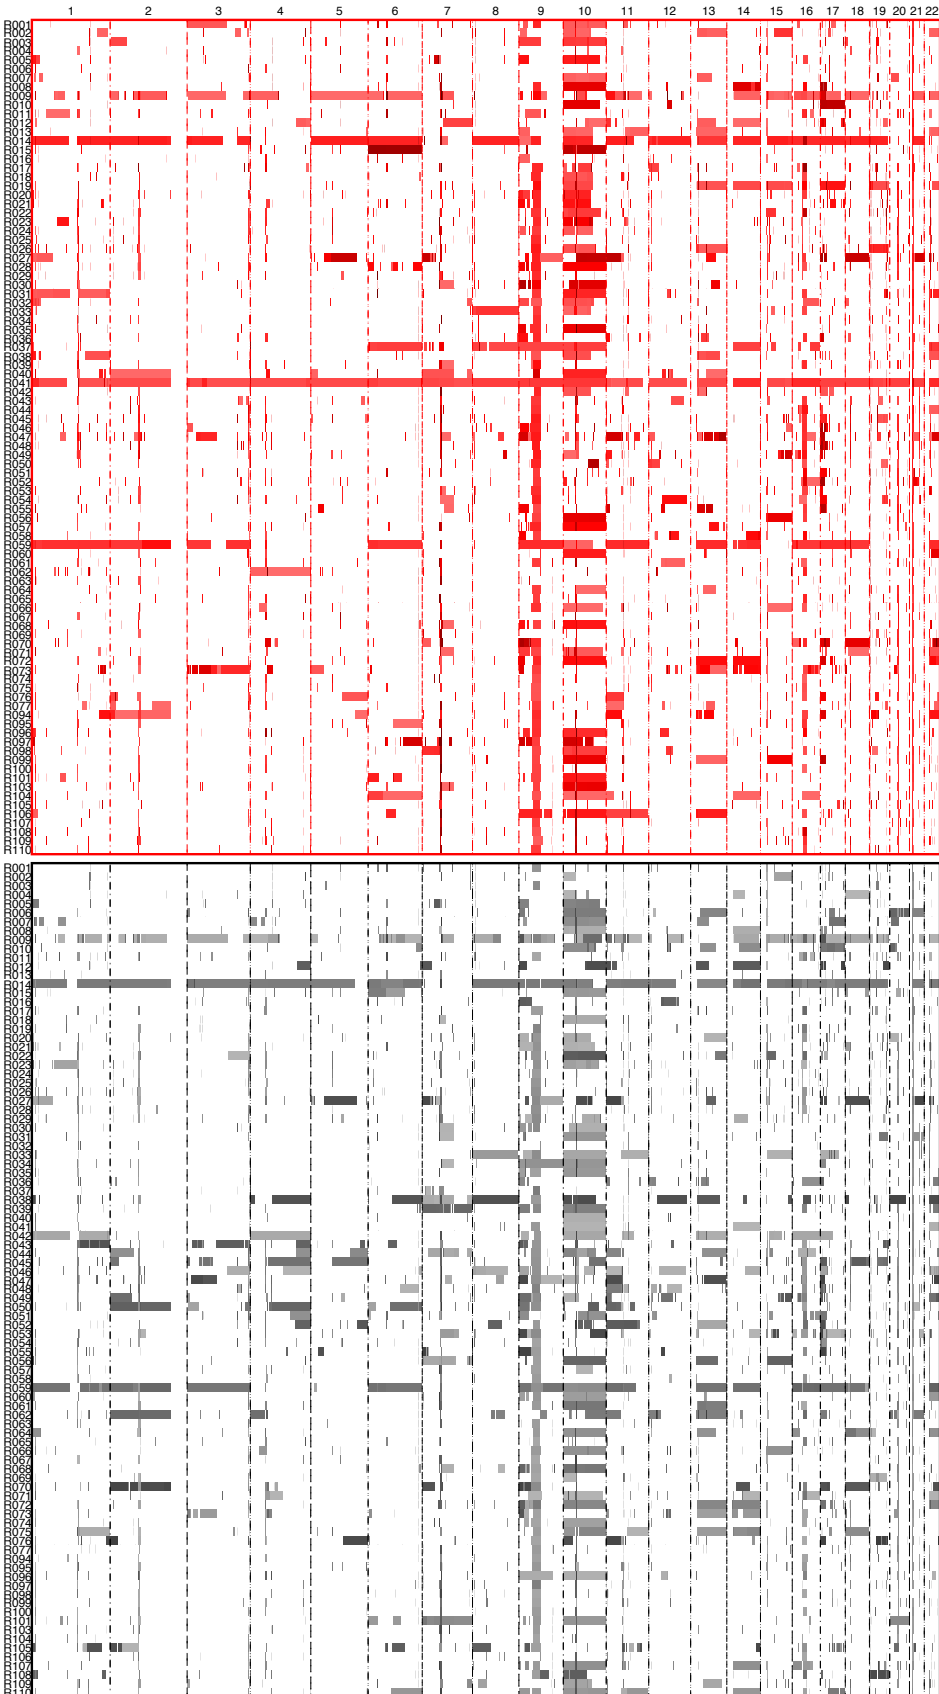

**Supplementary Figure 3:** Loss of heterozygosity (LOH) analysis based on WES data. Upper panel represents LOH regions in initial tumors, and lower panel represents that of the recurrent tumors.
