# Supplementary material
Source: PubMed Central journal article supplement (PMC5627776)
Supplement: NIHMS861778-supplement-suppl_fig__5.pdf [file NIHMS861778-supplement-suppl_fig__5.pdf]

## MGMT fusion in recurrent tumor of Patient R114

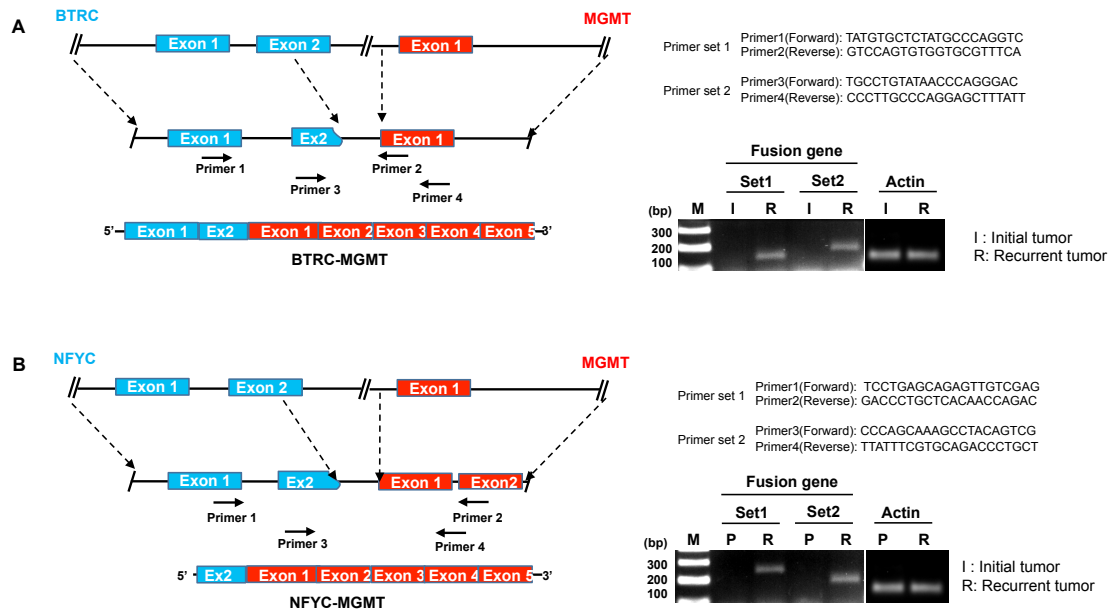

**Supplementary Figure 5:** Experimental validation of *MGMT* fusion in patient R114.

Solid black arrows indicate the position of the fusion genome primers, which generate fusion-specific PCR products.
