# Supplementary material
Source: PubMed Central journal article supplement (PMC5627776)
Supplement: NIHMS861778-supplement-suppl_fig__6.pdf [file NIHMS861778-supplement-suppl_fig__6.pdf]

### MGMT Expression, Methylation, and Overall Survival in IDH1-wild-type Primary GBM

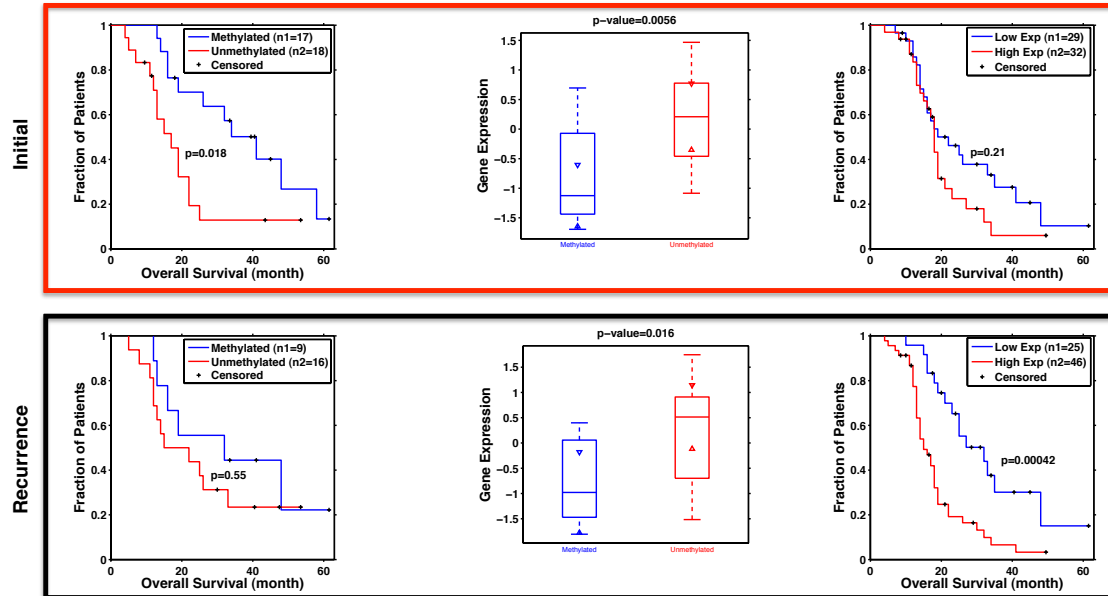

**Supplementary Figure 6:** MGMT expression, methylation, and overall survival in IDH1 wild type primary GBM. P-values of the survival analyses were calculated based on logrank test, and p-values of the boxplot were based on ranksum test. Gene expression level of MGMT was measured by Z-score based on RNA-seq data. High expression means  $Z > 0$ , and low expression means  $Z < 0$ .
