# Supplementary material
Source: PubMed Central journal article supplement (PMC5627776)
Supplement: NIHMS861778-supplement-suppl_fig__8.pdf [file NIHMS861778-supplement-suppl_fig__8.pdf]

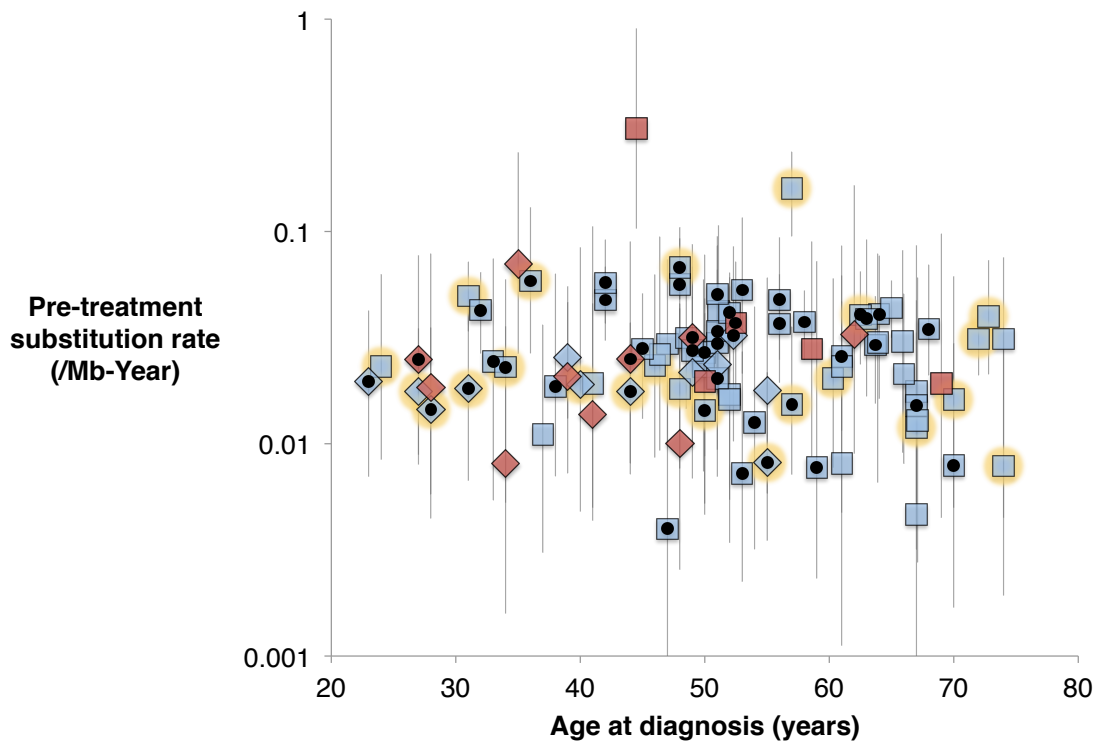

**Supplementary Figure 8:** No relationship is evident between pre-treatment substitution rate and age at diagnosis (median and 95% credible interval shown for each patient). Symbol legend as in Figure 3C,D.
