# Supplementary material
Source: PubMed Central journal article supplement (PMC5627776)
Supplement: NIHMS861778-supplement-suppl_fig__9.pdf [file NIHMS861778-supplement-suppl_fig__9.pdf]

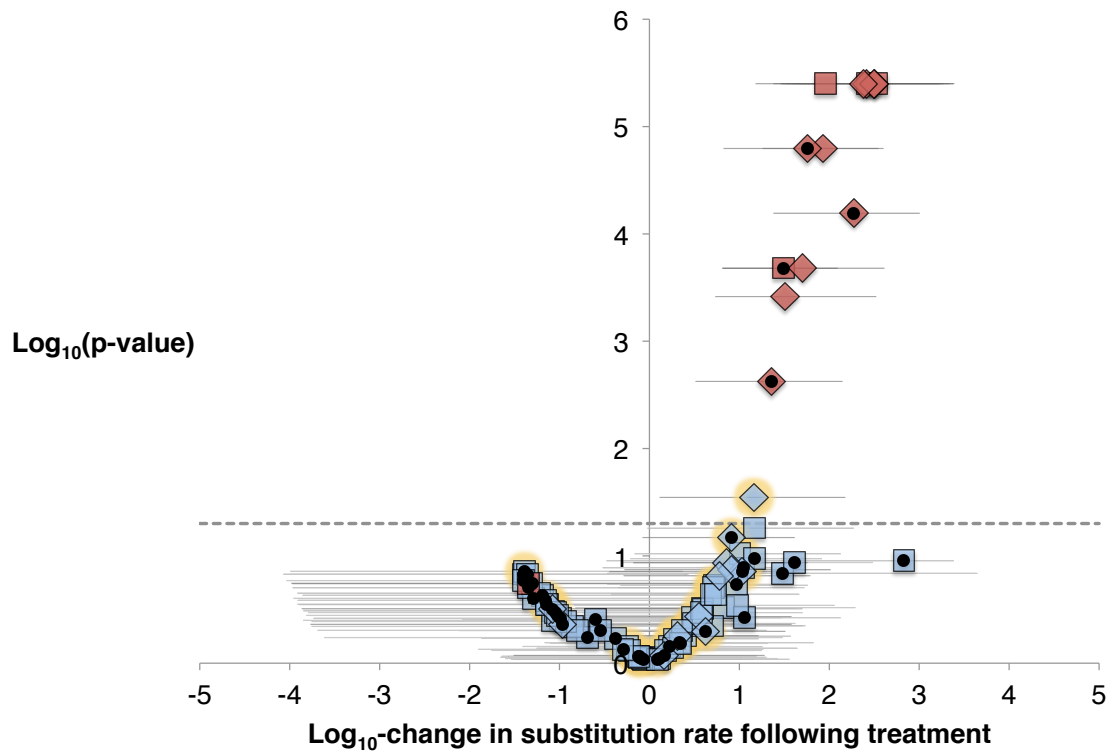

**Supplementary Figure 9:** Volcano plot of fold-change in substitution rate following treatment (median and 95% credible interval of ratio of post- to pre-treatment substitution rates). Horizontal dashed line shows  $p=0.05$ . Symbol legend as in Figure 3C,D.
