# Supplementary material
Source: PubMed Central journal article supplement (PMC5627776)
Supplement: NIHMS861778-supplement-suppl_fig__10.pdf [file NIHMS861778-supplement-suppl_fig__10.pdf]

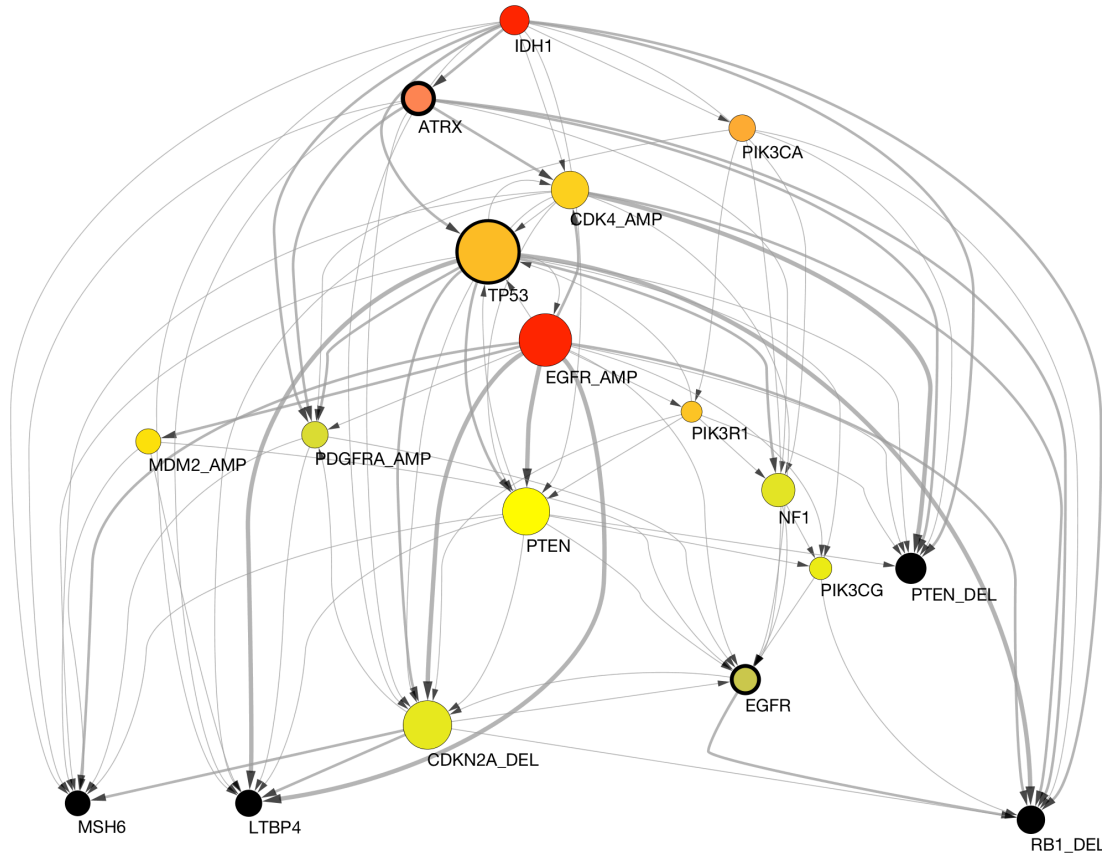

**Supplementary Figure 10:** Tumor evolutionary directed graph of both genes mutations and copy number alterations. Figure legend is the same as Figure 3D.
