# Supplementary material
Source: PubMed Central journal article supplement (PMC5627776)
Supplement: NIHMS861778-supplement-suppl_fig__11.pdf [file NIHMS861778-supplement-suppl_fig__11.pdf]

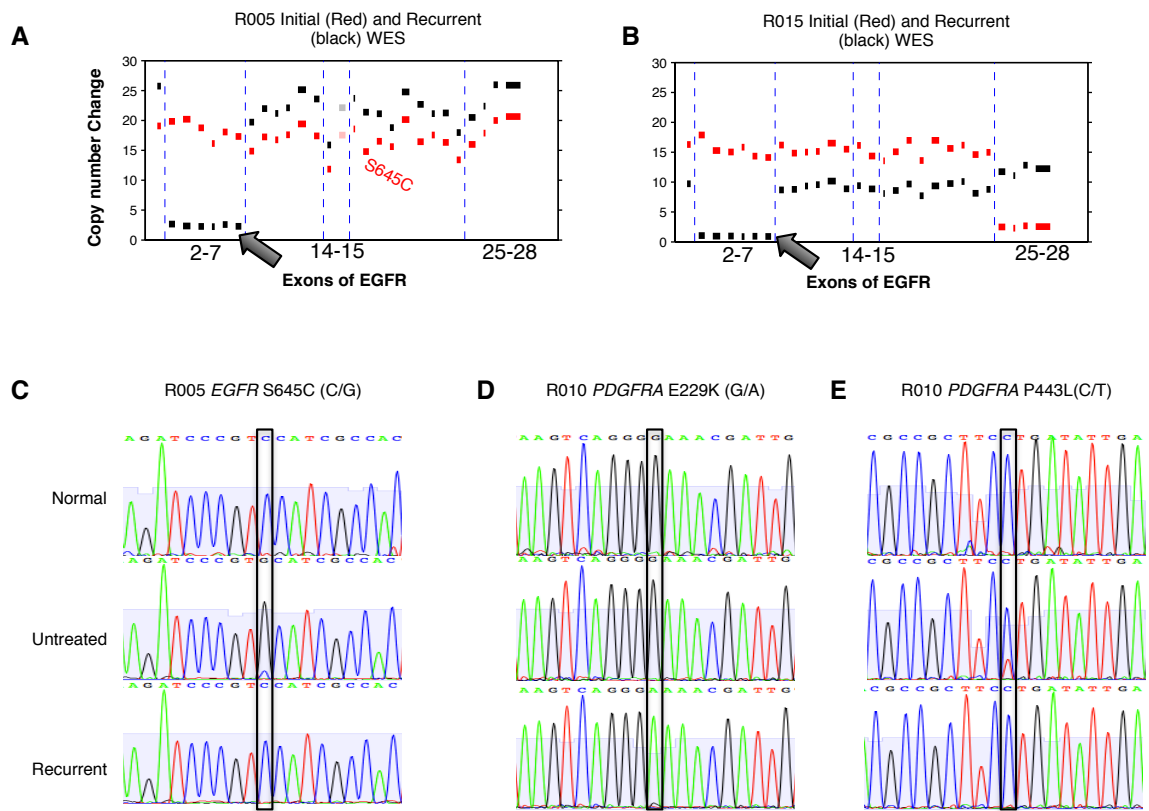

**Supplementary Figure 11:** Evidences of clonal switching of key driver genes during GBM evolution. **(A-B)** Rearrangement of *EGFR* exons based on WES data. X-axis indicates 28 exons of *EGFR* gene, and y-axis indicates the copy number change comparing with corresponding normal control. Red indicates untreated samples, while black indicates recurrent samples. Gain of *EGFR*vIII was highlighted. **(C-E)** Sanger validation of mutations of some key driver genes.
