# Supplementary material
Source: PubMed Central journal article supplement (PMC5627776)
Supplement: NIHMS861778-supplement-suppl_fig__12.pdf [file NIHMS861778-supplement-suppl_fig__12.pdf]

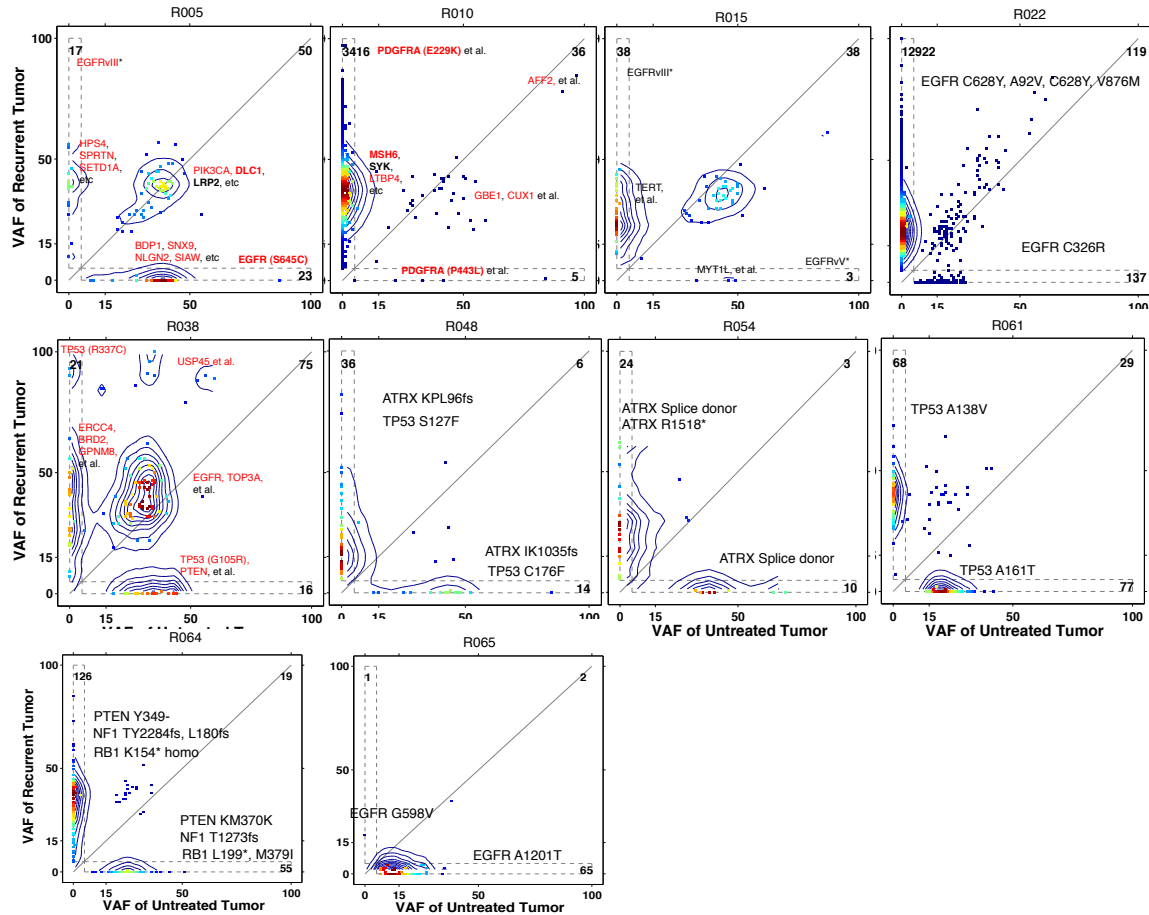

**Supplementary Figure 12:** Mutation contour plot, illustrating the variant allele fraction (VAF) of somatic SNVs and small INDELS in untreated and recurrent tumors of patient with clonal switching in key driver genes. The gray dashed rectangles indicate mutations undetectable (<5%) in one of those two samples. The numbers inside the square indicate the number of mutations in common, only in recurrent, and only in untreated tumor. Mutations in bold were validated by Sanger, and those in red were expressed. The dot color and the contours indicate node density.
