# Supplementary material
Source: PubMed Central journal article supplement (PMC5627776)
Supplement: NIHMS861778-supplement-suppl_fig__13.pdf [file NIHMS861778-supplement-suppl_fig__13.pdf]

### Expression-based Subtypes Predicts Overall Survival in IDH1-wild-type Primary GBM

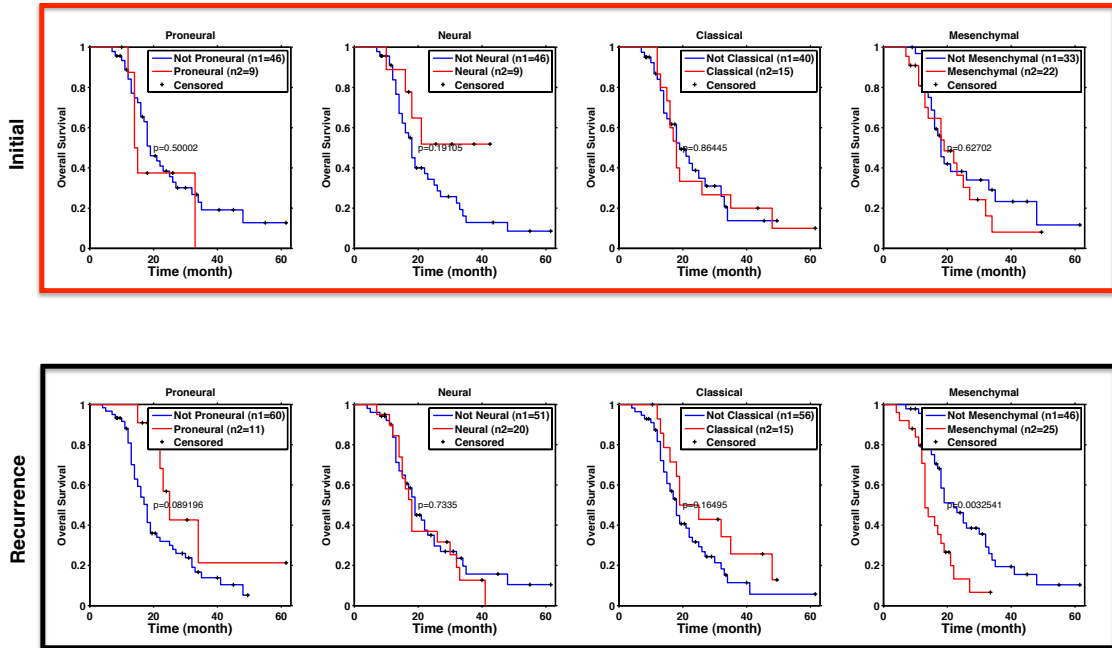

**Supplementary Figure 13:** Expression-based GBM subtyping predicts GBM overall survival in recurrent tumor. P-values were calculated based on logrank test. Only IDH1 wild type primary GBM was considered in this analysis.
