# Supplementary material
Source: PubMed Central journal article supplement (PMC5627776)
Supplement: NIHMS861778-supplement-suppl_fig__15.pdf [file NIHMS861778-supplement-suppl_fig__15.pdf]

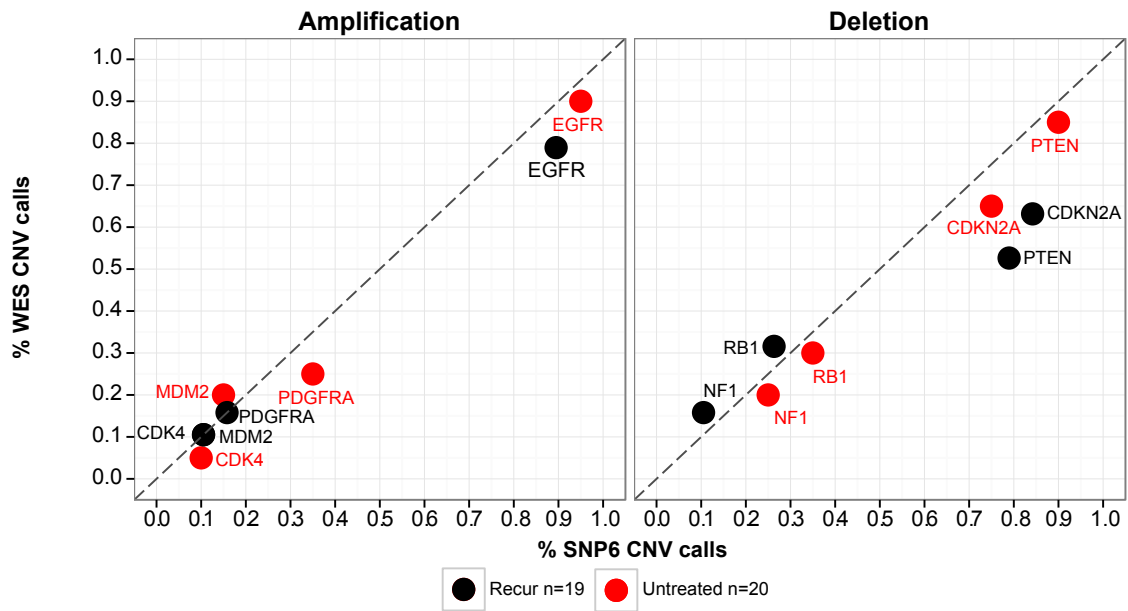

**Supplementary Figure 15:** The calibration of copy number methods. X-axis indicates the fraction of alterations based on SNP array method, and y-axis indicates that of our WES-based method.
