# Supplementary material
Source: PubMed Central journal article supplement (PMC5627776)
Supplement: NIHMS861778-supplement-suppl_fig__16.pdf [file NIHMS861778-supplement-suppl_fig__16.pdf]

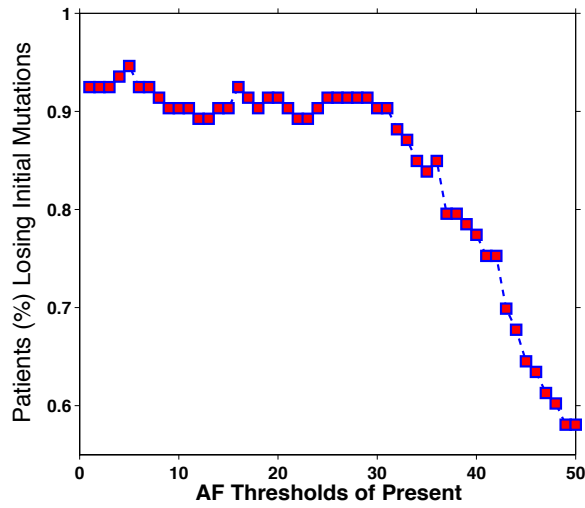

**Supplementary Figure 16:** The fraction of patients losing initial mutations. Different allele frequency cutoffs were applied to identify patients with at least one mutation in the initial tumor that is absent from the recurrent tumor. For any presence/absence cutoff below 30%, about 90% of patients lose at least one mutation, suggesting that the tumor at diagnosis is not a direct ancestor of the clone at relapse.
