# Supplementary material
Source: PubMed Central journal article supplement (PMC5627776)

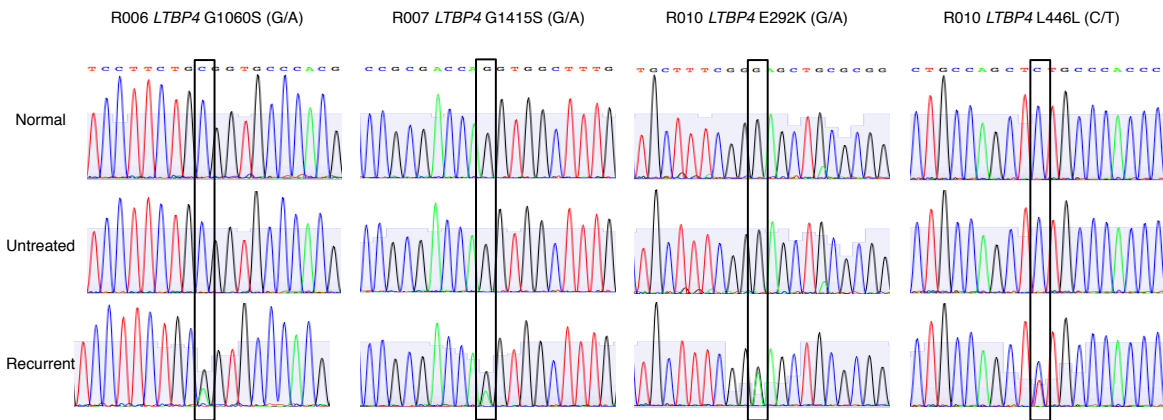

**Supplementary Figure 14:** Sanger validation of *LTBP4* mutations in cohort INCB.

Supplement: NIHMS861778-supplement-suppl_fig__14.pdf [file NIHMS861778-supplement-suppl_fig__14.pdf]

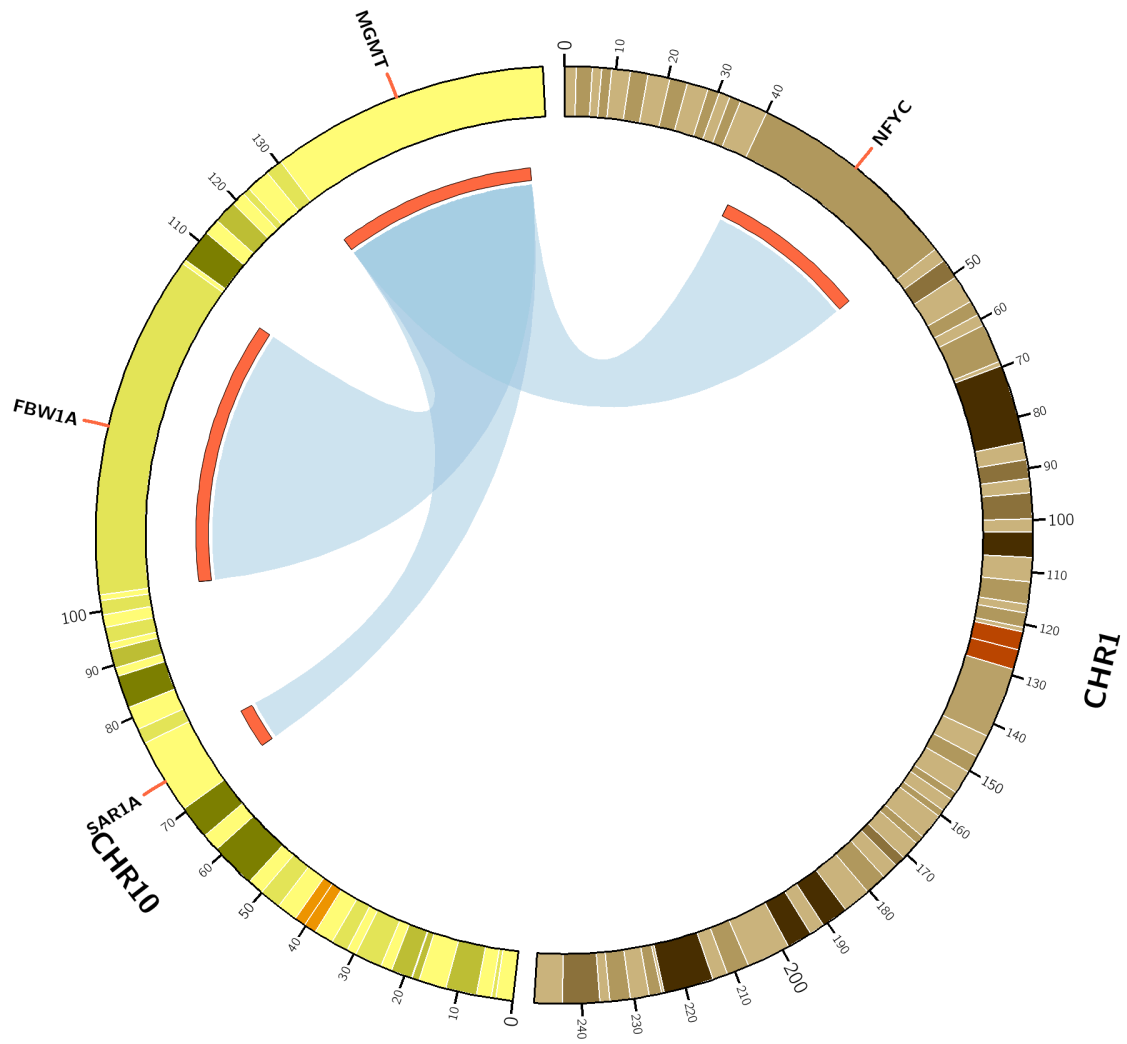

Supplementary Figure 4: Circos plot of *MGMT* fusions.

Supplement: NIHMS861778-supplement-suppl_fig__4.pdf [file NIHMS861778-supplement-suppl_fig__4.pdf]
